# Supplementary material for: The 22nd Chromatography Component of the Fasciola gigantica Excretory-Secretory Products Decreased the Proliferation of Peripheral Blood Mononuclear Cells from Buffalo
Source: MDPI journal article supplement (doi:10.3390/ani13040564), 2023-02-06
Supplement: s1 [file s1]

Table S2. The inhibition percentages of different concentrations of F22 on buffalo PBMC proliferation induced by optimal and optimal doses of mitogen.

| Mitogen | Dose<br>( $\mu\text{g}/\text{well}$ ) | Concentration<br>( $\mu\text{g}/\text{well}$ ) | Buffalo A<br>(♂)<br>Murrha | Buffalo B<br>(♂)<br>Murrha | Buffalo C<br>(♀)<br>Murrha | Buffalo D<br>(♀)<br>Native<br>cross-bred |
|---------|---------------------------------------|------------------------------------------------|----------------------------|----------------------------|----------------------------|------------------------------------------|
| ConA    | 0.25                                  | 0                                              | 0.00                       | 0.00                       | 0.00                       | 0.00                                     |
|         |                                       | 1                                              | 52.22                      | 34.87                      | 59.43                      | 58.96                                    |
|         |                                       | 2                                              | 66.55                      | 61.26                      | 58.08                      | 77.54                                    |
|         |                                       | 4                                              | 73.66                      | 76.42                      | 68.85                      | 82.82                                    |
|         |                                       | 8                                              | 80.01                      | 84.79                      | 78.95                      | 82.08                                    |
|         |                                       | 16                                             | 71.23                      | 86.17                      | 70.24                      | 85.56                                    |
|         | 1                                     | 0                                              | 0.00                       | 0.00                       | 0.00                       | 0.00                                     |
|         |                                       | 1                                              | 21.36                      | 34.14                      | 50.51                      | 62.28                                    |
|         |                                       | 2                                              | 55.61                      | 68.32                      | 74.89                      | 60.80                                    |
|         |                                       | 4                                              | 74.50                      | 81.47                      | 79.88                      | 79.89                                    |
|         |                                       | 8                                              | 81.73                      | 87.69                      | 83.51                      | 84.58                                    |
|         |                                       | 16                                             | 82.01                      | 88.88                      | 78.79                      | 88.45                                    |
| PHA     | 0.25                                  | 0                                              | 0.00                       | 0.00                       | 0.00                       | 0.00                                     |
|         |                                       | 1                                              | 2.34                       | -5.81                      | -0.29                      | 15.62                                    |
|         |                                       | 2                                              | -1.17                      | -1.84                      | 4.71                       | 17.26                                    |
|         |                                       | 4                                              | 46.20                      | 36.70                      | 47.06                      | 56.49                                    |
|         |                                       | 8                                              | 42.92                      | 46.79                      | 47.56                      | 53.64                                    |
|         |                                       | 16                                             | 40.35                      | 34.71                      | 35.29                      | 46.28                                    |
|         | 1                                     | 0                                              | 0.00                       | 0.00                       | 0.00                       | 0.00                                     |
|         |                                       | 1                                              | 24.23                      | 21.78                      | 11.67                      | 2.20                                     |
|         |                                       | 2                                              | 35.50                      | 28.77                      | 8.02                       | 21.43                                    |
|         |                                       | 4                                              | 44.03                      | 43.35                      | 38.37                      | 41.01                                    |
|         |                                       | 8                                              | 53.93                      | 55.90                      | 50.35                      | 40.69                                    |
|         |                                       | 16                                             | 65.19                      | 63.03                      | 54.30                      | 59.94                                    |
