# Supplementary material for: The 22nd Chromatography Component of the Fasciola gigantica Excretory-Secretory Products Decreased the Proliferation of Peripheral Blood Mononuclear Cells from Buffalo
Source: MDPI journal article supplement (doi:10.3390/ani13040564), 2023-02-06
Supplement: s1 [file s1]

Table S1. The inhibition percentages of different concentrations of *FgESP* on buffalo PBMC proliferation induced by optimal and optimal doses of mitogen.

| Mitogen | Dose<br>( $\mu\text{g}/\text{well}$ ) | Concentration<br>( $\mu\text{g}/\text{well}$ ) | Buffalo A<br>(♂)<br>Murrha | Buffalo B<br>(♂)<br>Murrha | Buffalo C<br>(♀)<br>Murrha | Buffalo D<br>(♀)<br>Native<br>cross-bred |
|---------|---------------------------------------|------------------------------------------------|----------------------------|----------------------------|----------------------------|------------------------------------------|
| ConA    | 0.25                                  | 0                                              | 0.00                       | 0.00                       | 0.00                       | 0.00                                     |
|         |                                       | 1                                              | 1.96                       | 6.69                       | -6.64                      | -9.80                                    |
|         |                                       | 2                                              | -33.69                     | -0.75                      | -2.26                      | 8.35                                     |
|         |                                       | 4                                              | -9.28                      | 2.64                       | 9.84                       | 9.82                                     |
|         |                                       | 8                                              | 6.96                       | 11.81                      | 23.63                      | 22.38                                    |
|         |                                       | 16                                             | 9.28                       | 17.21                      | 34.09                      | 33.40                                    |
|         | 1                                     | 0                                              | 0.00                       | 0.00                       | 0.00                       | 0.00                                     |
|         |                                       | 1                                              | 4.66                       | -3.51                      | 19.97                      | 5.78                                     |
|         |                                       | 2                                              | -1.30                      | -14.02                     | 0.30                       | -33.99                                   |
|         |                                       | 4                                              | -3.48                      | -1.11                      | 20.42                      | -2.97                                    |
|         |                                       | 8                                              | 6.25                       | 2.21                       | 21.48                      | -20.79                                   |
|         |                                       | 16                                             | 1.68                       | 13.65                      | 22.69                      | 14.19                                    |
| PHA     | 0.25                                  | 0                                              | 0.00                       | 0.00                       | 0.00                       | 0.00                                     |
|         |                                       | 1                                              | 2.60                       | 5.52                       | 4.72                       | 1.53                                     |
|         |                                       | 2                                              | 22.51                      | 22.73                      | 20.50                      | 11.48                                    |
|         |                                       | 4                                              | 22.15                      | 20.14                      | 21.73                      | 18.38                                    |
|         |                                       | 8                                              | -4.04                      | -8.38                      | 3.82                       | 2.52                                     |
|         |                                       | 16                                             | -0.48                      | 1.25                       | 8.24                       | 5.11                                     |
|         | 1                                     | 0                                              | 0.00                       | 0.00                       | 0.00                       | 0.00                                     |
|         |                                       | 1                                              | 8.59                       | 4.41                       | 20.65                      | -8.62                                    |
|         |                                       | 2                                              | 8.59                       | 6.27                       | 14.02                      | 5.56                                     |
|         |                                       | 4                                              | 16.72                      | 7.46                       | 28.81                      | -0.73                                    |
|         |                                       | 8                                              | -14.69                     | -26.27                     | 8.06                       | 2.70                                     |
|         |                                       | 16                                             | -17.03                     | -23.73                     | 29.02                      | -4.96                                    |
